# Supplementary material for: Metallophilic Au(i)⋯M(i) interactions (M = Tl, Ag) in heteronuclear complexes with 1,4,7-triazacyclononane: structural features and optical properties
Source: Royal Society of Chemistry journal article supplement (doi:10.1039/d0dt01902j), 2020-01-01
Supplement: d0dt01902j1.pdf [file d0dt01902j1.pdf]

## SUPPORTING INFORMATION

### Metallophilic Au(I)⋯M(I) Interactions (M = Tl, Ag) in Heteronuclear Complexes with 1,4,7-Triazacyclononane: Structural Features and Optical Properties

R. Donamaría, V. Lippolis, J. M. López-de-Luzuriaga, M. Monge, M. Niedu, M. E. Olmos

**Table S1. Selected bond lengths [Å] and angles [°] for  $\{[\{\text{Au}(\text{C}_6\text{Cl}_5)_2\}\text{Tl}(\text{TACN})\}_2\}_n$  (1)**

|                     |            |                    |            |
|---------------------|------------|--------------------|------------|
| Tl(1)-Au(1)         | 3.3377(6)  | Au(1)-C(1)         | 2.056(9)   |
| Tl(1)-Au(2)         | 3.5478(6)  | Au(2)-C(7)         | 2.039(9)   |
| Tl(1)-N(1)          | 2.663(8)   | Tl(1)-Cl(10)#2     | 3.6366(5)  |
| Tl(1)-N(2)          | 2.614(9)   | Tl(1)-Cl(3)#4      | 3.6923(5)  |
| Tl(1)-N(3)          | 2.671(9)   |                    |            |
| <hr/>               |            |                    |            |
| Au(1)-Tl(1)-Au(2)   | 144.29(1)  | N(1)-Tl(1)-Au(1)   | 70.01(16)  |
| C(1)-Au(1)-C(1)#1   | 180.0      | N(3)-Tl(1)-Au(1)   | 126.63(17) |
| Tl(1)-Au(1)-Tl(1)#1 | 180.0      | N(2)-Tl(1)-Au(2)   | 72.66(18)  |
| C(7)-Au(2)-C(7)#2   | 180.0      | N(1)-Tl(1)-Au(2)   | 136.86(16) |
| Tl(1)-Au(2)-Tl(1)#2 | 180.0      | N(3)-Tl(1)-Au(2)   | 89.08(17)  |
| N(2)-Tl(1)-N(1)     | 65.4(2)    | C(1)-Au(1)-Tl(1)   | 93.4(2)    |
| N(2)-Tl(1)-N(3)     | 66.3(3)    | C(1)-Au(1)-Tl(1)#1 | 86.6(2)    |
| N(1)-Tl(1)-N(3)     | 65.7(2)    | C(7)-Au(2)-Tl(1)   | 97.2(3)    |
| N(2)-Tl(1)-Au(1)    | 118.61(19) | C(7)-Au(2)-Tl(1)#2 | 82.8(3)    |

Symmetry transformations used to generate equivalent atoms:

#1 -x+1,-y+1,-z+1 #2 -x+1,-y+1,-z+2 #4 -x+1,-y+2,-z+1

**Table S2. Hydrogen bonds for  $\{[\text{Au}(\text{C}_6\text{Cl}_5)_2\text{Ti}(\text{TACN})]_2\}_n$  (1).**

| D-H...A                | d(D-H) | d(H...A)  | d(D...A)  | <(DHA) |
|------------------------|--------|-----------|-----------|--------|
| N(1)-H(1)...Au(1)      | 0.99   | 2.9315(4) | 3.4867(4) | 129.1  |
| C(16)-H(16A)...Au(2)   | 0.99   | 3.0261(5) | 3.8534(4) | 141.8  |
| N(1)-H(1)...Cl(8)#1    | 1.00   | 2.89      | 3.460(4)  | 116.9  |
| N(2)-H(2)...Cl(5)#2    | 1.00   | 2.85      | 3.458(4)  | 119.6  |
| N(3)-H(3)...Cl(9)#3    | 1.00   | 2.88      | 3.678(4)  | 137.3  |
| N(3)-H(3)...Cl(10)#3   | 1.00   | 2.83      | 3.644(4)  | 138.9  |
| C(15)-H(15B)...Cl(6)#4 | 0.99   | 2.87      | 3.717(5)  | 144.3  |
| C(17)-H(17A)...Cl(2)#4 | 0.99   | 2.98      | 3.735(5)  | 134.3  |
| C(17)-H(17B)...Cl(9)#3 | 0.99   | 2.95      | 3.738(5)  | 137.2  |
| C(18)-H(18B)...Cl(8)#1 | 0.99   | 2.94      | 3.563(5)  | 122.0  |

Symmetry transformations used to generate equivalent atoms:  
 #1 -x+1,-y+1,-z+1 #2 -x+1,-y+1,-z+2 #3 -x+2,-y+1,-z+ #4 -x+2,-y,-z+2  
 #5 -x+2,-y+1,-z+2 #6 -x+1,-y+2,-z+1 #7 x,y+1,z

**Table S3. Selected bond lengths [Å] and angles [°] for  $[\{\text{Au}(\text{C}_6\text{Cl}_5)_2\}\text{Ag}(\text{TACN})]$  (3)**

|                  |            |                  |            |
|------------------|------------|------------------|------------|
| Au(1)-Ag(1)      | 2.6915(4)  | Ag(1)-C(1)       | 2.398(4)   |
| Ag(1)-N(1)       | 2.429(4)   | Au(1)-C(1)       | 2.081(4)   |
| Ag(1)-N(2)       | 2.365(4)   | Au(1)-C(7)       | 2.035(4)   |
| Ag(1)-N(3)       | 2.386(4)   |                  |            |
| C(1)-Au(1)-C(7)  | 176.62(17) | N(2)-Ag(1)-Au(1) | 129.07(10) |
| C(1)-Au(1)-Ag(1) | 58.68(12)  | N(2)-Ag(1)-N(3)  | 76.05(14)  |
| C(7)-Au(1)-Ag(1) | 124.70(13) | N(2)-Ag(1)-C(1)  | 160.06(15) |
| N(1)-Ag(1)-Au(1) | 142.92(10) | N(3)-Ag(1)-Au(1) | 133.09(10) |
| N(1)-Ag(1)-C(1)  | 99.50(14)  | N(3)-Ag(1)-N(1)  | 74.99(14)  |
| N(1)-Ag(1)-N(2)  | 74.40(14)  | N(3)-Ag(1)-C(1)  | 121.34(14) |
| C(1)-Ag(1)-Au(1) | 47.83(10)  |                  |            |

**Table S4. Hydrogen bonds for  $[\{\text{Au}(\text{C}_6\text{Cl}_5)_2\}\text{Ag}(\text{TACN})]$  (3).**

| D-H...A                | d(D-H) | d(H...A) | d(D...A) | <(DHA) |
|------------------------|--------|----------|----------|--------|
| N(1)-H(1)...Cl(8)#1    | 1.00   | 2.89     | 3.460(4) | 116.9  |
| N(2)-H(2)...Cl(5)#2    | 1.00   | 2.85     | 3.458(4) | 119.6  |
| N(3)-H(3)...Cl(9)#3    | 1.00   | 2.88     | 3.678(4) | 137.3  |
| N(3)-H(3)...Cl(10)#3   | 1.00   | 2.83     | 3.644(4) | 138.9  |
| C(15)-H(15B)...Cl(6)#4 | 0.99   | 2.87     | 3.717(5) | 144.3  |
| C(17)-H(17A)...Cl(2)#4 | 0.99   | 2.98     | 3.735(5) | 134.3  |
| C(17)-H(17B)...Cl(9)#3 | 0.99   | 2.95     | 3.738(5) | 137.2  |
| C(18)-H(18B)...Cl(8)#1 | 0.99   | 2.94     | 3.563(5) | 122.0  |

Symmetry transformations used to generate equivalent atoms:

#1  $x, y, z+1$  #2  $-x+1, -y, -z+1$  #3  $-x+1, -y+1, -z+1$  #4  $x-1, y, z$

**Table S5. Selected bond lengths [Å] and angles [°] for  
[Au(C<sub>6</sub>F<sub>5</sub>)<sub>2</sub>]{Ag(TACN)}<sub>2</sub>Au(C<sub>6</sub>F<sub>5</sub>)<sub>2</sub> (4).**

|                     |           |                      |            |
|---------------------|-----------|----------------------|------------|
| Au(1)-Ag(1)         | 2.7331(9) | Au(1)-C(1)           | 2.087(9)   |
| Au(1)-Au(2)         | 3.4022(9) | Au(2)-C(7)           | 2.048(9)   |
| Ag(1)-N(1)          | 2.324(8)  | Ag(1)-C(1)#1         | 2.359(9)   |
| Ag(1)-N(2)          | 2.411(8)  | Ag(1)-F(10)#2        | 3.095(6)   |
| Ag(1)-N(3)          | 2.464(8)  |                      |            |
|                     |           |                      |            |
| C(1)-Au(1)-C(1)#1   | 178.6(5)  | N(2)-Ag(1)-N(3)      | 73.2(3)    |
| C(1)-Au(1)-Ag(1)#1  | 56.7(3)   | N(1)-Ag(1)-Au(1)     | 119.49(19) |
| C(1)-Au(1)-Ag(1)    | 124.3(3)  | C(1)#1-Ag(1)-Au(1)   | 47.7(2)    |
| C(1)#1-Au(1)-Ag(1)  | 56.7(3)   | N(2)-Ag(1)-Au(1)     | 164.79(19) |
| Ag(1)#1-Au(1)-Ag(1) | 110.33(4) | N(3)-Ag(1)-Au(1)     | 106.93(19) |
| C(7)-Au(2)-C(7)#1   | 179.0(5)  | N(1)-Ag(1)-F(10)#1   | 91.1(2)    |
| N(1)-Ag(1)-C(1)#1   | 166.2(3)  | C(1)#1-Ag(1)-F(10)#1 | 89.3(3)    |
| N(1)-Ag(1)-N(2)     | 75.5(3)   | N(2)-Ag(1)-F(10)#1   | 71.4(2)    |
| C(1)#1-Ag(1)-N(2)   | 117.6(3)  | N(3)-Ag(1)-F(10)#1   | 144.2(2)   |
| N(1)-Ag(1)-N(3)     | 74.8(3)   | Au(1)-Ag(1)-F(10)#1  | 108.68(12) |
| C(1)#1-Ag(1)-N(3)   | 112.1(3)  |                      |            |

Symmetry transformations used to generate equivalent atom:

#1 -x+1,y,-z+1/2 #2 -x+1,y-1,-z+1/2

**Table S6. Hydrogen bonds for  $[\{\text{Au}(\text{C}_6\text{F}_5)_2\}\{\text{Ag}(\text{TACN})\}_2\text{Au}(\text{C}_6\text{F}_5)_2]$  (4).**

| D-H...A                | d(D-H) | d(H...A)  | d(D...A)  | <(DHA) |
|------------------------|--------|-----------|-----------|--------|
| C(15)-H(15B)...Au(2)#1 | 0.99   | 2.8010(3) | 3.5941(4) | 137.5  |
| N(2)-H(2)...F(3)#2     | 1.00   | 2.2239(2) | 3.2209(3) | 174.8  |
| N(3)-H(3)...F(5)#1     | 1.00   | 2.56      | 3.172(10) | 119.2  |
| N(3)-H(3)...F(6)       | 1.00   | 2.56      | 3.267(10) | 127.3  |
| C(14)-H(14B)...F(2)#3  | 0.99   | 2.49      | 3.350(11) | 144.8  |
| C(15)-H(15B)...F(5)#4  | 0.99   | 2.53      | 3.226(11) | 127.3  |
| C(17)-H(17A)...F(8)#5  | 0.99   | 2.62      | 3.260(11) | 122.3  |

Symmetry transformations used to generate equivalent atoms:

#1  $-x+1, y, -z+1/2$  #2  $x+1/2, y+1/2, z$  #3  $-x+1, -y+2, -z+1$

#4  $-x+1, y+1, -z+1/2$  #5  $x+1/2, y-1/2, z$

**Table S7.** Population analysis (%) for the model system **1a**.

| <b>Model 1a</b> | <b>Tl</b> | <b>Au</b> | <b>L<sub>5</sub></b> | <b>C<sub>6</sub>Cl<sub>5</sub></b> |
|-----------------|-----------|-----------|----------------------|------------------------------------|
| LUMO+6          | 10,2      | 3,84      | 2,31                 | 83,44                              |
| LUMO+5          | 36,8      | 25,15     | 5,47                 | 30,22                              |
| LUMO+4          | 33,16     | 18,83     | 1,51                 | 46,26                              |
| LUMO+3          | 42,47     | 12,62     | 14,6                 | 29,67                              |
| LUMO+2          | 10,7      | 20,59     | 0,79                 | 67,7                               |
| LUMO+1          | 11,66     | 23,66     | 0,65                 | 59,35                              |
| LUMO            | 37,35     | 26        | 4,18                 | 32,08                              |
| HOMO            | 30,58     | 47,96     | 10,56                | 10,85                              |
| HOMO-1          | 23,15     | 40,79     | 13,93                | 22                                 |
| HOMO-2          | 10,61     | 27,08     | 5,16                 | 57,08                              |
| HOMO-3          | 1,22      | 2,28      | 0,56                 | 95,75                              |
| HOMO-4          | 25,22     | 31,05     | 23,21                | 19,61                              |
| HOMO-5          | 6,37      | 5,89      | 6,88                 | 80,64                              |
| HOMO-6          | 3,68      | 5,22      | 1,63                 | 89,41                              |
| HOMO-7          | 1,52      | 19,73     | 1,66                 | 74,93                              |
| HOMO-8          | 9,53      | 20,88     | 32,44                | 36,83                              |

**Table S8.** Population analysis (%) for the model system **3a**.

| <b>Model 3a</b> | <b>Au</b> | <b>Ag</b> | <b>L<sub>5</sub></b> | <b>C<sub>6</sub>Cl<sub>5</sub></b> |
|-----------------|-----------|-----------|----------------------|------------------------------------|
| LUMO+3          | 24        | 58        | 1                    | 17                                 |
| LUMO+2          | 6         | 13        | 1                    | 81                                 |
| LUMO+1          | 9         | 12        | 1                    | 78                                 |
| LUMO            | 18        | 17        | 3                    | 62                                 |
| HOMO            | 19        | 33        | 22                   | 26                                 |
| HOMO-1          | 13        | 5         | 5                    | 77                                 |
| HOMO-2          | 1         | 1         | 0                    | 98                                 |
| HOMO-3          | 24        | 27        | 27                   | 21                                 |
| HOMO-4          | 42        | 20        | 19                   | 19                                 |
| HOMO-5          | 1         | 2         | 1                    | 97                                 |
| HOMO-6          | 17        | 20        | 12                   | 51                                 |

**Table S9.** Population analysis (%) for the model system **4a**

| <b>Model 4a</b> | <b>Au<sub>A</sub></b> | <b>Ag</b> | <b>L<sub>5</sub></b> | <b>(C<sub>6</sub>F<sub>5</sub>)<sub>A</sub></b> | <b>Au<sub>B</sub></b> | <b>(C<sub>6</sub>F<sub>5</sub>)<sub>B</sub></b> |
|-----------------|-----------------------|-----------|----------------------|-------------------------------------------------|-----------------------|-------------------------------------------------|
| LUMO+2          | 1                     | 43        | 1                    | 1                                               | 54                    | 0                                               |
| LUMO+1          | 1                     | 20        | 9                    | 49                                              | 21                    | 1                                               |
| LUMO            | 3                     | 32        | 4                    | 14                                              | 45                    | 2                                               |
| HOMO            | 26                    | 20        | 5                    | 13                                              | 28                    | 9                                               |
| HOMO-1          | 9                     | 21        | 12                   | 14                                              | 6                     | 38                                              |
| HOMO-2          | 28                    | 5         | 3                    | 9                                               | 2                     | 53                                              |
| HOMO-3          | 4                     | 26        | 17                   | 9                                               | 8                     | 36                                              |
| HOMO-4          | 6                     | 3         | 1                    | 4                                               | 6                     | 80                                              |

**Table S10.** TD-DFT first Singlet-Singlet Excitation Calculations for model system **1a**.

| Model                    | exc.                     | $\lambda_{\text{calc}}$ (nm) | f (s)                          | contributions                    |
|--------------------------|--------------------------|------------------------------|--------------------------------|----------------------------------|
| <b>1a</b>                | $S_0 \rightarrow S_1$    | 363                          | 0.2748                         | HOMO $\rightarrow$ LUMO (47)     |
|                          | $S_0 \rightarrow S_2$    | 332                          | 0.0218                         | HOMO-1 $\rightarrow$ LUMO(48)    |
|                          | $S_0 \rightarrow S_4$    | 320                          | 0.1297                         | HOMO-3 $\rightarrow$ LUMO (27)   |
|                          |                          |                              |                                | HOMO-2 $\rightarrow$ LUMO (16)   |
|                          | $S_0 \rightarrow S_6$    | 310                          | 0.0106                         | HOMO-3 $\rightarrow$ LUMO (16)   |
|                          |                          |                              |                                | HOMO-2 $\rightarrow$ LUMO (31)   |
|                          | $S_0 \rightarrow S_8$    | 303                          | 0.0281                         | HOMO $\rightarrow$ LUMO+6 (33))  |
|                          | $S_0 \rightarrow S_{14}$ | 286                          | 0.0244                         | HOMO-7 $\rightarrow$ LUMO (25)   |
|                          | $S_0 \rightarrow S_{15}$ | 284                          | 0.0754                         | HOMO-6 $\rightarrow$ LUMO (25)   |
|                          | $S_0 \rightarrow S_{16}$ | 283                          | 0.0189                         | HOMO $\rightarrow$ LUMO(+4) (19) |
|                          |                          |                              |                                | HOMO $\rightarrow$ LUMO+5 (20)   |
|                          | $S_0 \rightarrow S_{17}$ | 282                          | 0.0172                         | HOMO-3 $\rightarrow$ LUMO+2 (13) |
|                          | $S_0 \rightarrow S_{18}$ | 281                          | 0.0159                         | HOMO-2 $\rightarrow$ LUMO+1 (23) |
| $S_0 \rightarrow S_{19}$ | 280                      | 0.0204                       | HOMO-8 $\rightarrow$ LUMO (15) |                                  |

**Table S11.** TD-DFT first Singlet-Singlet Excitation Calculations for model system **3a**.

| Model     | exc.                     | $\lambda_{\text{calc}}$ (nm) | f (s)  | contributions                    |
|-----------|--------------------------|------------------------------|--------|----------------------------------|
| <b>3a</b> | $S_0 \rightarrow S_1$    | 319                          | 0.0667 | HOMO $\rightarrow$ LUMO (47)     |
|           | $S_0 \rightarrow S_2$    | 295                          | 0.0182 | HOMO-3 $\rightarrow$ LUMO(16)    |
|           |                          |                              |        | HOMO-1 $\rightarrow$ LUMO (29)   |
|           | $S_0 \rightarrow S_5$    | 284                          | 0.0321 | HOMO-4 $\rightarrow$ LUMO (16)   |
|           | $S_0 \rightarrow S_{12}$ | 259                          | 0.0423 | HOMO-6 $\rightarrow$ LUMO (13)   |
|           | $S_0 \rightarrow S_{13}$ | 258                          | 0.1696 | HOMO-6 $\rightarrow$ LUMO (24)   |
|           | $S_0 \rightarrow S_{14}$ | 257                          | 0.0126 | HOMO-2 $\rightarrow$ 109 (15)    |
|           | $S_0 \rightarrow S_{16}$ | 255                          | 0.0127 | HOMO-4 $\rightarrow$ LUMO+2 (21) |
|           | $S_0 \rightarrow S_{19}$ | 250                          | 0.0210 | HOMO-4 $\rightarrow$ LUMO+2 (15) |



**Table S12.** TD-DFT first Singlet-Singlet Excitation Calculations for model system **4a**.

| <b>Model</b>             | <b>exc.</b>              | <b><math>\lambda_{\text{calc}}</math> (nm)</b> | <b>f (s)</b>                     | <b>contributions</b>             |
|--------------------------|--------------------------|------------------------------------------------|----------------------------------|----------------------------------|
| <b>4a</b>                | $S_0 \rightarrow S_1$    | 357                                            | 0.0806                           | HOMO $\rightarrow$ LUMO (48)     |
|                          | $S_0 \rightarrow S_2$    | 338                                            | 0.0841                           | HOMO $\rightarrow$ LUMO+1 (48)   |
|                          | $S_0 \rightarrow S_4$    | 302                                            | 0.039                            | HOMO-2 $\rightarrow$ LUMO (22)   |
|                          |                          |                                                |                                  | HOMO-1 $\rightarrow$ LUMO+1 (19) |
|                          | $S_0 \rightarrow S_5$    | 300                                            | 0.0278                           | HOMO-3 $\rightarrow$ LUMO(37)    |
|                          | $S_0 \rightarrow S_6$    | 296                                            | 0.0147                           | HOMO-2 $\rightarrow$ LUMO (24)   |
|                          | $S_0 \rightarrow S_9$    | 290                                            | 0.0106                           | HOMO-6 $\rightarrow$ LUMO (18)   |
|                          | $S_0 \rightarrow S_{13}$ | 282                                            | 0.0147                           | HOMO-2 $\rightarrow$ LUMO+1 (39) |
|                          | $S_0 \rightarrow S_{15}$ | 276                                            | 0.0185                           | HOMO-8 $\rightarrow$ LUMO (18)   |
|                          |                          | HOMO-3 $\rightarrow$ LUMO+1 (19)               |                                  |                                  |
| $S_0 \rightarrow S_{16}$ | 274                      | 0.0272                                         | HOMO-6 $\rightarrow$ LUMO+1 (29) |                                  |

**Table S13. Details of data collection and refinement for  $\{[\{\text{Au}(\text{C}_6\text{Cl}_5)_2\text{TI}(\text{TACN})\}_2]_n\}$  (1).**

| <b>Complex</b>                                 | <b>1</b>                                                        |
|------------------------------------------------|-----------------------------------------------------------------|
| Empirical formula                              | $\text{C}_{18}\text{H}_{15}\text{AuCl}_{10}\text{N}_3\text{TI}$ |
| Formula weight                                 | 1029.17                                                         |
| Temperature/K                                  | 105.24                                                          |
| Crystal system                                 | Triclinic                                                       |
| Space group                                    | P-1                                                             |
| a/Å                                            | 9.8906(14)                                                      |
| b/Å                                            | 10.6441(15)                                                     |
| c/Å                                            | 13.108(2)                                                       |
| $\alpha/^\circ$                                | 86.361(5)                                                       |
| $\beta/^\circ$                                 | 87.662(5)                                                       |
| $\gamma/^\circ$                                | 73.880(5)                                                       |
| Volume/Å <sup>3</sup>                          | 1322.7(3)                                                       |
| Z                                              | 2                                                               |
| $\rho_{\text{calc}}/\text{g}/\text{cm}^3$      | 2.582                                                           |
| $\mu/\text{mm}^{-1}$                           | 12.649                                                          |
| F(000)                                         | 946.0                                                           |
| Crystal size/mm <sup>3</sup>                   | 0.607 × 0.143 × 0.098                                           |
| Radiation                                      | MoK $\alpha$ ( $\lambda = 0.71073$ )                            |
| 2 $\theta$ range for data collection/ $^\circ$ | 6.048 to 55.788                                                 |
| Reflections collected                          | 26098                                                           |
| Independent reflections                        | 6265 [ $R_{\text{int}} = 0.1112$ ]                              |
| Data/restraints/parameters                     | 6265/0/307                                                      |
| Goodness-of-fit on F <sup>2</sup>              | 0.999                                                           |
| Final R indexes [ $I \geq 2\sigma(I)$ ]        | $R_1 = 0.0481$ , $wR_2 = 0.1026$                                |
| Final R indexes [all data]                     | $R_1 = 0.0907$ , $wR_2 = 0.1201$                                |
| Largest diff. peak/hole / e Å <sup>-3</sup>    | 3.46/-1.97                                                      |

**Table S14. Details of data collection and refinement for  $[\{\text{Au}(\text{C}_6\text{Cl}_5)_2\}\text{Ag}(\text{TACN})]$  (3).**

| <b>Complex</b>                                 | <b>3</b>                                                 |
|------------------------------------------------|----------------------------------------------------------|
| Empirical formula                              | $\text{C}_{18}\text{H}_{15}\text{AgAuCl}_{10}\text{N}_3$ |
| Formula weight                                 | 932.67                                                   |
| Temperature/K                                  | 109.99                                                   |
| Crystal system                                 | Triclinic                                                |
| Space group                                    | P-1                                                      |
| a/Å                                            | 8.9202(7)                                                |
| b/Å                                            | 11.8246(8)                                               |
| c/Å                                            | 13.9123(11)                                              |
| $\alpha/^\circ$                                | 107.085(2)                                               |
| $\beta/^\circ$                                 | 100.045(3)                                               |
| $\gamma/^\circ$                                | 106.406(2)                                               |
| Volume/Å <sup>3</sup>                          | 1291.47(17)                                              |
| Z                                              | 2                                                        |
| $\rho_{\text{calc}}/\text{cm}^3$               | 2.398                                                    |
| $\mu/\text{mm}^{-1}$                           | 7.482                                                    |
| F(000)                                         | 880.0                                                    |
| Crystal size/mm <sup>3</sup>                   | 0.383 × 0.104 × 0.04                                     |
| Radiation                                      | MoK $\alpha$ ( $\lambda = 0.71073$ )                     |
| 2 $\theta$ range for data collection/ $^\circ$ | 6.004 to 55.84                                           |
| Reflections collected                          | 26368                                                    |
| Independent reflections                        | 6159 [ $R_{\text{int}} = 0.0575$ ]                       |
| Data/restraints/parameters                     | 6159/0/299                                               |
| Goodness-of-fit on $F^2$                       | 1.028                                                    |
| Final R indexes [ $I \geq 2\sigma(I)$ ]        | $R_1 = 0.0308$ , $wR_2 = 0.0632$                         |
| Final R indexes [all data]                     | $R_1 = 0.0441$ , $wR_2 = 0.0682$                         |
| Largest diff. peak/hole / e Å <sup>-3</sup>    | 1.63/-1.77                                               |

**Table S15. Details of data collection and refinement for****[{Au(C<sub>6</sub>F<sub>5</sub>)<sub>2</sub>}{Ag(TACN)}<sub>2</sub>Au(C<sub>6</sub>F<sub>5</sub>)<sub>2</sub>] (4).**

| <b>Compound</b>                             | <b>4</b>                                                           |
|---------------------------------------------|--------------------------------------------------------------------|
| Empirical formula                           | C <sub>18</sub> H <sub>15</sub> AgAuF <sub>10</sub> N <sub>3</sub> |
| Formula weight                              | 768.17                                                             |
| Temperature/K                               | 101.05                                                             |
| Crystal system                              | Monoclinic                                                         |
| Space group                                 | C2/c                                                               |
| a/Å                                         | 23.744(3)                                                          |
| b/Å                                         | 8.6609(10)                                                         |
| c/Å                                         | 20.843(3)                                                          |
| α/°                                         | 90                                                                 |
| β/°                                         | 109.049(5)                                                         |
| γ/°                                         | 90                                                                 |
| Volume/Å <sup>3</sup>                       | 4051.5(10)                                                         |
| Z                                           | 8                                                                  |
| ρ <sub>calc</sub> /g/cm <sup>3</sup>        | 2.519                                                              |
| μ/mm <sup>-1</sup>                          | 8.303                                                              |
| F(000)                                      | 2880.0                                                             |
| Crystal size/mm <sup>3</sup>                | 0.709 × 0.107 × 0.061                                              |
| Radiation                                   | MoKα (λ = 0.71073)                                                 |
| 2θ range for data collection/°              | 5.67 to 53.02                                                      |
| Reflections collected                       | 27708                                                              |
| Independent reflections                     | 4143 [R <sub>int</sub> = 0.2373]                                   |
| Data/restraints/parameters                  | 4143/301/299                                                       |
| Goodness-of-fit on F <sup>2</sup>           | 1.026                                                              |
| Final R indexes [I >= 2σ (I)]               | R <sub>1</sub> = 0.0576, wR <sub>2</sub> = 0.0705                  |
| Final R indexes [all data]                  | R <sub>1</sub> = 0.1195, wR <sub>2</sub> = 0.0826                  |
| Largest diff. peak/hole / e Å <sup>-3</sup> | 1.18/-1.19                                                         |

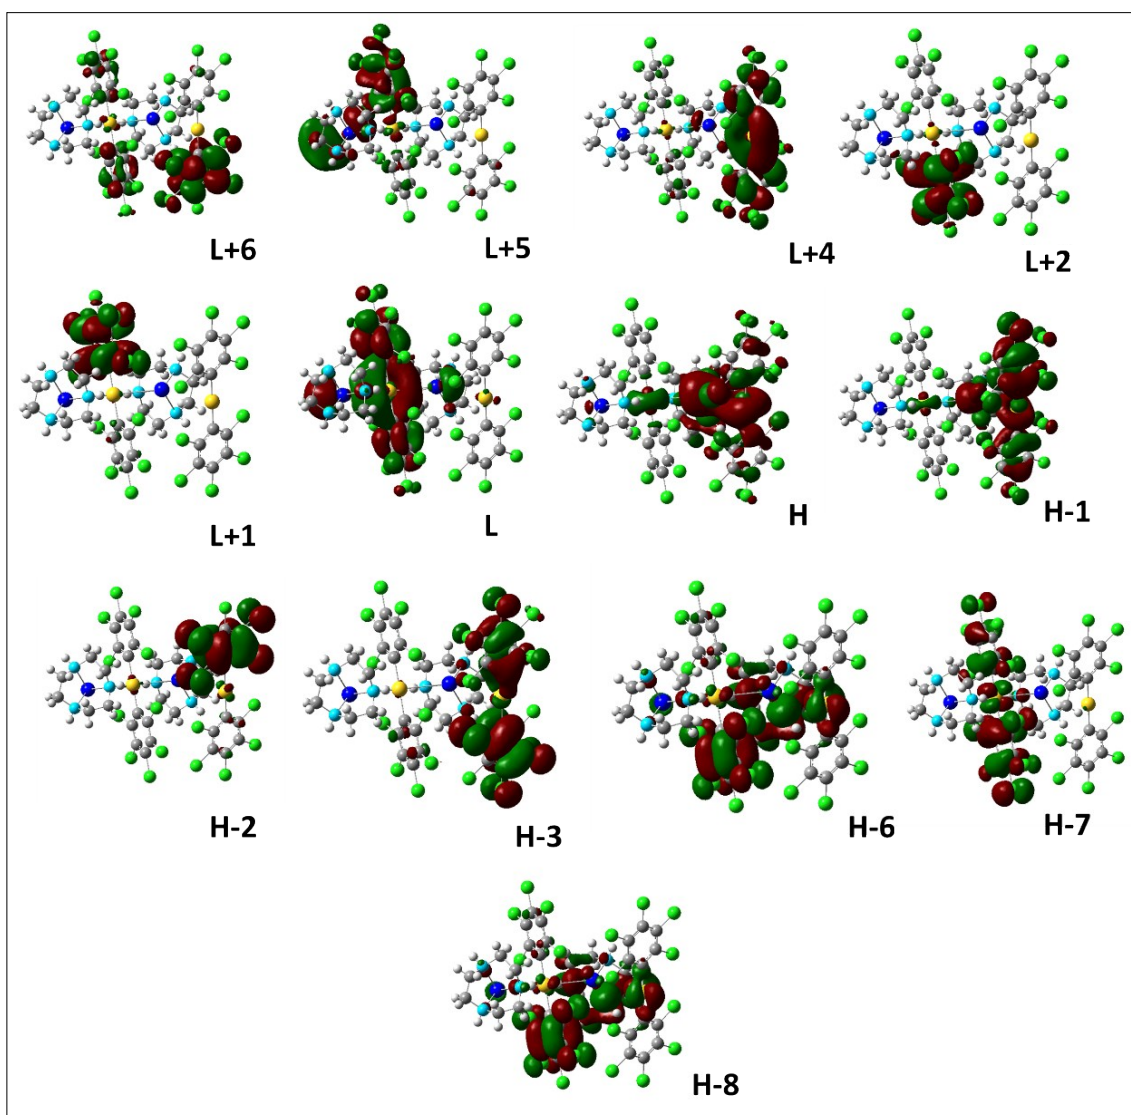

**Figure S1.** Most important frontier molecular orbitals (isovalue = 0.02) for model system **1a** (L=LUMO; H=HOMO).

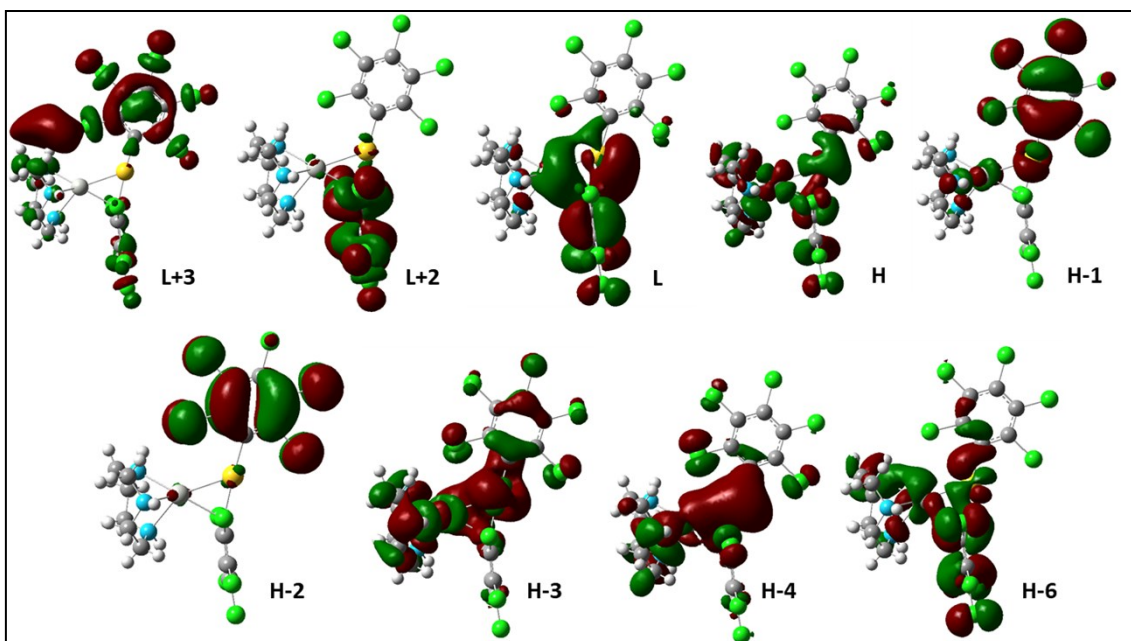

**Figure S2.** Most important frontier molecular orbitals (isovalue = 0.02) for model system 3a (L=LUMO; H=HOMO).

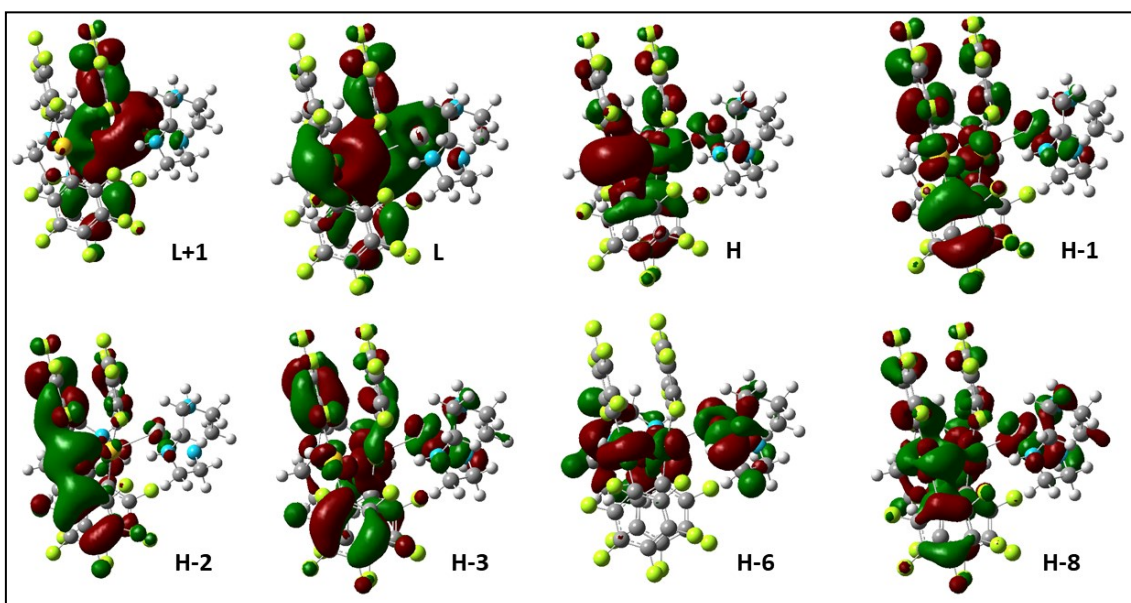

**Figure S3.** Most important frontier molecular orbitals (isovalue = 0.02) for model system 4a (L=LUMO; H=HOMO).
